# Supplementary material for: Fasting-Mimicking Diet Reduces Trimethylamine N-Oxide Levels and Improves Serum Biochemical Parameters in Healthy Volunteers
Source: MDPI journal article supplement (doi:10.3390/nu14051093), 2022-03-05
Supplement: s1 [file s1]

**Supplementary Table 1.** The original data sample of TMAO detection using UPLC/MS/MS analysis.

|    | Sample Text | Type     | Std. Conc | RT   | Area     | Height  | IS Area | Response | Detection Flags | Conc. | %Dev |
|----|-------------|----------|-----------|------|----------|---------|---------|----------|-----------------|-------|------|
| 1  | Std0        |          |           | 1.71 | 66.484   | 1024    | 42452   | 0.00157  | bb              | 0.02  |      |
| 2  | Std1        | Standard | 0.17      | 1.71 | 324.428  | 5056    | 42631   | 0.00761  | bb              | 0.19  | 11   |
| 3  | Std1        | Standard | 0.17      | 1.71 | 318.034  | 4892    | 43164   | 0.00737  | bb              | 0.18  | 7.1  |
| 4  | Std1        | Standard | 0.17      | 1.71 | 313.148  | 4946    | 42850   | 0.00731  | bb              | 0.18  | 6.1  |
| 5  | Std2        | Standard | 0.34      | 1.71 | 568.378  | 8869    | 43120   | 0.01318  | bb              | 0.34  | 0.7  |
| 6  | Std2        | Standard | 0.34      | 1.71 | 558.466  | 8666    | 43534   | 0.01283  | bb              | 0.33  | -2.2 |
| 7  | Std2        | Standard | 0.34      | 1.71 | 535.685  | 8276    | 43089   | 0.01243  | bb              | 0.32  | -5.4 |
| 8  | Std3        | Standard | 0.68      | 1.71 | 1046.538 | 16159   | 42155   | 0.02483  | bb              | 0.66  | -2.5 |
| 9  | Std3        | Standard | 0.68      | 1.71 | 998.805  | 15447   | 41416   | 0.02412  | bb              | 0.64  | -5.4 |
| 10 | Std3        | Standard | 0.68      | 1.71 | 1041.152 | 16218   | 42047   | 0.02476  | bb              | 0.66  | -2.7 |
| 11 | Std4        | Standard | 3.25      | 1.71 | 4931.394 | 77089   | 41633   | 0.11845  | bb              | 3.23  | -0.8 |
| 12 | Std4        | Standard | 3.25      | 1.71 | 4813.635 | 75055   | 42246   | 0.11394  | bb              | 3.1   | -4.5 |
| 13 | Std4        | Standard | 3.25      | 1.71 | 4863.459 | 75288   | 42179   | 0.1153   | bb              | 3.14  | -3.4 |
| 14 | Std5        | Standard | 13.67     | 1.71 | 20547.32 | 318532  | 39672   | 0.51793  | bb              | 13.85 | 1.3  |
| 15 | Std5        | Standard | 13.67     | 1.71 | 19921.92 | 308757  | 39590   | 0.50321  | bb              | 13.47 | -1.5 |
| 16 | Std5        | Standard | 13.67     | 1.71 | 20217.15 | 315503  | 39122   | 0.51678  | bb              | 13.82 | 1.1  |
| 17 | Std6        | Standard | 34.18     | 1.71 | 48451.29 | 743715  | 36122   | 1.34133  | bb              | 34.4  | 0.6  |
| 18 | Std6        | Standard | 34.18     | 1.71 | 47198.57 | 721789  | 35699   | 1.32213  | bb              | 33.94 | -0.7 |
| 19 | Std6        | Standard | 34.18     | 1.71 | 47897.53 | 736975  | 35520   | 1.34847  | bb              | 34.57 | 1.1  |
| 20 | Std7        | Standard | 68.35     | 1.71 | 86924.29 | 1315792 | 30450   | 2.85468  | bb              | 68.46 | 0.2  |
| 21 | Std7        | Standard | 68.35     | 1.71 | 87341.48 | 1318469 | 30275   | 2.88497  | bb              | 69.1  | 1.1  |
| 22 | Std7        | Standard | 68.35     | 1.71 | 85197.59 | 1288035 | 30420   | 2.80071  | bb              | 67.31 | -1.5 |
| 23 | Std0        |          |           | 1.71 | 83.691   | 1282    | 41345   | 0.00202  | bb              | 0.03  |      |
| 24 | Blank       |          |           | 1.71 | 71.725   | 1089    |         |          | bb              |       |      |
| 25 | QC Std3     | QC       | 0.68      | 1.71 | 1009.712 | 15651   | 41067   | 0.02459  | bb              | 0.66  | -3.5 |
| 26 | QC Std5     | QC       | 13.67     | 1.71 | 20290.67 | 315454  | 39380   | 0.51526  | bb              | 13.78 | 0.8  |
| 27 | Blank       |          |           | 1.71 | 79.463   | 1210    |         |          | bb              |       |      |
| 28 | Lo-01       |          |           | 1.71 | 6039.451 | 93347   | 44396   | 0.13604  | bb              | 3.7   |      |
| 29 | Lo-01       |          |           | 1.71 | 6133.015 | 94523   | 45674   | 0.13428  | bb              | 3.66  |      |

|    |         |    |       |      |          |        |       |         |    |       |      |
|----|---------|----|-------|------|----------|--------|-------|---------|----|-------|------|
| 30 | Lo-02   |    |       | 1.71 | 3505.479 | 53543  | 44729 | 0.07837 | bb | 2.13  |      |
| 31 | Lo-02   |    |       | 1.71 | 3537.478 | 54899  | 45730 | 0.07736 | bb | 2.1   |      |
| 32 | Lo-03   |    |       | 1.71 | 4686.411 | 72447  | 45533 | 0.10292 | bb | 2.8   |      |
| 33 | Lo-03   |    |       | 1.71 | 4785.255 | 73613  | 45710 | 0.10469 | bb | 2.85  |      |
| 34 | Lo-04   |    |       | 1.71 | 2955.973 | 45281  | 46542 | 0.06351 | bb | 1.73  |      |
| 35 | Lo-04   |    |       | 1.71 | 2885.156 | 44306  | 45989 | 0.06274 | bb | 1.7   |      |
| 36 | Lo-05   |    |       | 1.71 | 4006.632 | 62056  | 45709 | 0.08765 | bb | 2.39  |      |
| 37 | Lo-05   |    |       | 1.71 | 4036.774 | 62502  | 46961 | 0.08596 | bb | 2.34  |      |
| 38 | Lo-06   |    |       | 1.71 | 19850.93 | 305676 | 44122 | 0.44991 | bb | 12.08 |      |
| 39 | Lo-06   |    |       | 1.71 | 20135.51 | 311505 | 44134 | 0.45623 | bb | 12.24 |      |
| 40 | Lo-07   |    |       | 1.71 | 4166.833 | 63923  | 47797 | 0.08718 | bb | 2.37  |      |
| 41 | Lo-07   |    |       | 1.71 | 4121.874 | 63660  | 46894 | 0.0879  | bb | 2.39  |      |
| 42 | Lo-08   |    |       | 1.71 | 2289.944 | 35184  | 46832 | 0.0489  | bb | 1.32  |      |
| 43 | Lo-08   |    |       | 1.71 | 2243.637 | 34534  | 46825 | 0.04792 | bb | 1.3   |      |
| 44 | Lo-09   |    |       | 1.71 | 5357.708 | 83189  | 46809 | 0.11446 | bb | 3.12  |      |
| 45 | Lo-09   |    |       | 1.71 | 5317.834 | 81884  | 46459 | 0.11446 | bb | 3.12  |      |
| 46 | Lo-10   |    |       | 1.71 | 8597.462 | 132868 | 45590 | 0.18858 | bb | 5.13  |      |
| 47 | Lo-10   |    |       | 1.71 | 8833.816 | 137076 | 47388 | 0.18641 | bb | 5.07  |      |
| 48 | Lo-11   |    |       | 1.71 | 3383.108 | 52558  | 48471 | 0.0698  | bb | 1.9   |      |
| 49 | Lo-11   |    |       | 1.71 | 3413.598 | 52504  | 49421 | 0.06907 | bb | 1.88  |      |
| 50 | Lo-12   |    |       | 1.71 | 5792.995 | 88733  | 47078 | 0.12305 | bb | 3.35  |      |
| 51 | Lo-12   |    |       | 1.71 | 5834.93  | 89771  | 48009 | 0.12154 | bb | 3.31  |      |
| 52 | Blank   |    |       | 1.71 | 82.627   | 1226   |       |         | bb |       |      |
| 53 | QC Std3 | QC | 0.68  | 1.71 | 1155.614 | 17928  | 46965 | 0.02461 | bb | 0.66  | -3.4 |
| 54 | QC Std5 | QC | 13.67 | 1.71 | 21911.34 | 340872 | 43667 | 0.50179 | bb | 13.43 | -1.7 |
| 55 | Blank   |    |       | 1.71 | 80.74    | 1246   |       |         | bb |       |      |
| 56 | Lo-01-2 |    |       | 1.71 | 4168.061 | 64315  | 47147 | 0.08841 | bb | 2.41  |      |
| 57 | Lo-01-2 |    |       | 1.71 | 4207.027 | 65355  | 48003 | 0.08764 | bb | 2.39  |      |
| 58 | Lo-02-2 |    |       | 1.71 | 2986.733 | 46315  | 48982 | 0.06098 | bb | 1.66  |      |
| 59 | Lo-02-2 |    |       | 1.71 | 2917.715 | 44912  | 49666 | 0.05875 | bb | 1.59  |      |
| 60 | Lo-03-2 |    |       | 1.71 | 5451.363 | 83660  | 48030 | 0.1135  | bb | 3.09  |      |
| 61 | Lo-03-2 |    |       | 1.71 | 5518.889 | 84765  | 47226 | 0.11686 | bb | 3.18  |      |
| 62 | Lo-04-2 |    |       | 1.71 | 6431.987 | 98688  | 46938 | 0.13703 | bb | 3.73  |      |

|    |         |    |       |      |          |        |       |         |    |       |      |
|----|---------|----|-------|------|----------|--------|-------|---------|----|-------|------|
| 63 | Lo-04-2 |    |       | 1.71 | 6450.63  | 99273  | 47897 | 0.13468 | bb | 3.67  |      |
| 64 | Lo-05-2 |    |       | 1.71 | 2888.207 | 44637  | 48649 | 0.05937 | bb | 1.61  |      |
| 65 | Lo-05-2 |    |       | 1.71 | 2917.39  | 44821  | 47915 | 0.06089 | bb | 1.65  |      |
| 66 | Lo-06-2 |    |       | 1.71 | 3372.784 | 51417  | 48651 | 0.06933 | bb | 1.88  |      |
| 67 | Lo-06-2 |    |       | 1.71 | 3541.581 | 54467  | 47897 | 0.07394 | bb | 2.01  |      |
| 68 | Lo-07-2 |    |       | 1.71 | 20496.96 | 313640 | 44936 | 0.45613 | bb | 12.24 |      |
| 69 | Lo-07-2 |    |       | 1.71 | 20825.82 | 318982 | 44103 | 0.4722  | bb | 12.66 |      |
| 70 | Lo-08-2 |    |       | 1.71 | 3405.297 | 52159  | 49493 | 0.0688  | bb | 1.87  |      |
| 71 | Lo-08-2 |    |       | 1.71 | 3410.956 | 52474  | 49949 | 0.06829 | bb | 1.86  |      |
| 72 | Lo-09-2 |    |       | 1.71 | 5120.767 | 78983  | 49190 | 0.1041  | bb | 2.83  |      |
| 73 | Lo-09-2 |    |       | 1.71 | 5146.862 | 79199  | 49095 | 0.10484 | bb | 2.85  |      |
| 74 | Lo-10-2 |    |       | 1.71 | 8035.383 | 123480 | 47548 | 0.16899 | bb | 4.6   |      |
| 75 | Lo-10-2 |    |       | 1.71 | 8086.355 | 124550 | 48093 | 0.16814 | bb | 4.57  |      |
| 76 | Lo-11-2 |    |       | 1.71 | 5104.56  | 78044  | 49863 | 0.10237 | bb | 2.79  |      |
| 77 | Lo-11-2 |    |       | 1.71 | 5260.009 | 81421  | 49741 | 0.10575 | bb | 2.88  |      |
| 78 | Lo-12-2 |    |       | 1.71 | 3190.514 | 49229  | 49881 | 0.06396 | bb | 1.74  |      |
| 79 | Lo-12-2 |    |       | 1.71 | 3178.883 | 48411  | 48758 | 0.0652  | bb | 1.77  |      |
| 80 | Blank   |    |       | 1.71 | 85.725   | 1340   |       |         | bb |       |      |
| 81 | QC Std3 | QC | 0.68  | 1.71 | 1146.247 | 17778  | 47589 | 0.02409 | bb | 0.64  | -5.5 |
| 82 | QC Std5 | QC | 13.67 | 1.71 | 22408.66 | 348464 | 44848 | 0.49966 | bb | 13.38 | -2.1 |
| 83 | Blank   |    |       | 1.71 | 82.903   | 1238   |       |         | bb |       |      |

Quantification was carried out using the ratio of the peak areas of the sample and the internal standard (IS), based on the standard curve prepared using trimethylamine N-oxide (TMAO) (Alfa Aesar, Ward Hill, Massachusetts, USA) in a range of concentrations up to 68.35  $\mu\text{mol/L}$ . All standard curve concentrations are assayed in triplicate; test samples are assayed in duplicate. Between different sets of samples, additional quality control (QC) and blank samples are assayed.
